# Supplementary material for: Strategies for Covalent Labeling of Long RNAs
Source: PubMed Central journal article supplement — Chembiochem. 2021 Jun 17;22(19):2826–47. doi: 10.1002/cbic.202100161 (PMC8518768; doi:10.1002/cbic.202100161), 2021-06-17
Supplement: CBIC-22-2826-s001.pdf [file CBIC-22-2826-s001.pdf]

## **Author Contributions**

H.D. Visualization:Lead; Writing – original draft:Lead; Writing – review & editing:Equal

E.H. Visualization:Supporting; Writing – original draft:Equal

L.B. Writing – original draft:Equal

S.K.-S. Conceptualization:Lead; Funding acquisition:Lead; Supervision:Lead; Writing – original draft:Equal; Writing – review & editing:Equal
